# Supplementary material for: Oxone®-Mediated TEMPO-Oxidized Cellulose Nanomaterials form I and form II
Source: Molecules. 2020 Apr 17;25(8):1847. doi: 10.3390/molecules25081847 (PMC7221945; doi:10.3390/molecules25081847)
Supplement: Supplementary file 1 [file molecules-25-01847-s001.pdf]

**Supplemental Table S1.** XRD raw data used to determine crystallinity and crystallite size of OTO-CNM Form I, Form II, and MCC starting material including peak X position, peak intensity in counts (cts), peak area, and the full width at half maximum (FWHM) of the reported curve.

| Plane | Sample  | Peak X (2 $\theta$ ) | Peak Intensity (cts) | Peak Area (arb) | FWHM (2 $\theta$ ) |
|-------|---------|----------------------|----------------------|-----------------|--------------------|
| 101   | MCC     | 16.0                 | 428                  | 2024            | 4.43               |
|       | Form I  | 16.2                 | 271                  | 1335            | 4.62               |
|       | Form II | 16.5                 | 153                  | 817             | 4.99               |
| 002   | MCC     | 22.5                 | 968                  | 2957            | 2.87               |
|       | Form I  | 22.5                 | 862                  | 2353            | 2.57               |
|       | Form II | 22.5                 | 267                  | 1711            | 5.99               |

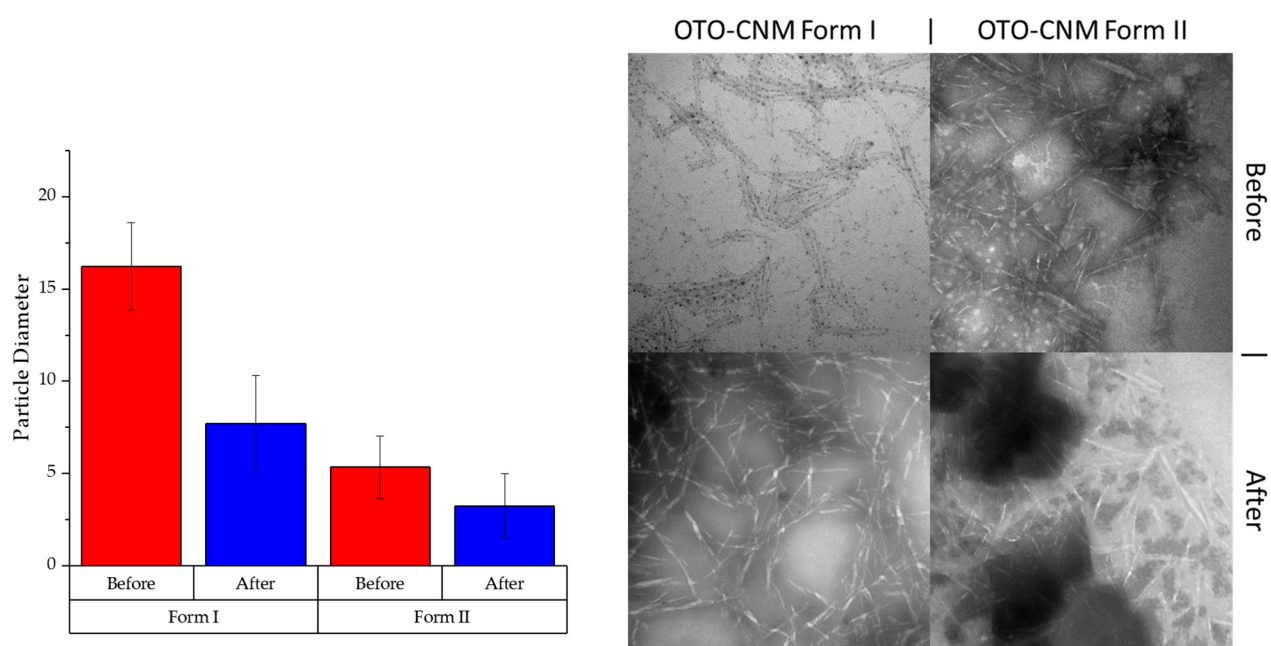

**Supplemental Figure S1.** TEM size analysis on OTO-CNM Form I and OTO-CNM Form II particle diameter before and after mechanical treatment. This figure shows the effect of mechanical treatment on the cellulose size after synthesis. While Form I is significantly affected by mechanical treatment post sonication, Form II show little change in size before and after mechanical treatment.
